# Supplementary material for: Temporal Changes in the Role of Species Sorting and Evolution Determine Community Dynamics
Source: Ecol Lett. 2024 Dec 31;28(1):e70033. doi: 10.1111/ele.70033 (PMC11687414; doi:10.1111/ele.70033)
Supplement: Supplementary file 2 — Table S6. [file ELE-28-0-s002.xlsx]

## Sheet: Supplementary Table 6
Species	strainID	Prey history	Predator history	locus tag	gene	prokka_gene	COG category	Function custom grouping	Reference	Function description	Number of nonsynonymous sites	Observed nonsyn mutations	Multiplicitiy	-log10(P)	P*
Aeromonas caviae	HAMBI_1972	ancestral	ancestral	H1972_01106	lamB_2	lamB_2	M	Transporter/Outer membrane	https://www.uniprot.org/uniprotkb/P02943/entry	Involved in the transport of maltose and maltodextrins. Indispensable for translocation of maltodextrins (alpha 1-4 linked polyglucosyls) containing more than three glucosyl moieties.	1107	2	1.44081	12.0522	9.08697
Aeromonas caviae	HAMBI_1972	ancestral	evolved	H1972_00421	hyp		S	Outer membrane		Located in flagellar operon. Protein of unknown function DUF115	819	3	2.92119	13.7812	8.11608
Aeromonas caviae	HAMBI_1972	ancestral	evolved	H1972_02826	ynjC		P	Transporter	DOI: 10.1038/s41467-022-30889-1	Colistin resistance. transport system permease component	1263	3	1.89427	12.4892	8.11608
Aeromonas caviae	HAMBI_1972	ancestral	evolved	H1972_01106	lamB_2	lamB_2	M	Transporter/Outer membrane	https://www.uniprot.org/uniprotkb/P02943/entry	Involved in the transport of maltose and maltodextrins. Indispensable for translocation of maltodextrins (alpha 1-4 linked polyglucosyls) containing more than three glucosyl moieties.	1107	13	9.36524	36.7368	8.11608
Aeromonas caviae	HAMBI_1972	evolved	ancestral	H1972_00157	puuA	puuA	E	Central metabolism		Involved in the breakdown of putrescine. Catalyzes the ATP-dependent gamma-glutamylation of putrescine, producing gamma-L-glutamylputrescine. Absolutely essential to utilize putrescine as both nitrogen and carbon sources and to decrease the toxicity of putrescine, which can lead to inhibition of cell growth and protein synthesis.	1138	3	2.10234	10.0716	6.56746
Aeromonas caviae	HAMBI_1972	evolved	ancestral	H1972_00269	rpoB	rpoB	K	Central metabolism		DNA-dependent RNA polymerase catalyzes the transcription of DNA into RNA using the four ribonucleoside triphosphates as substrates	3343	3	0.715662	6.93167	6.56746
Aeromonas caviae	HAMBI_1972	evolved	ancestral	H1972_00299	PAP2_like		M	Central metabolism	DOI: 10.1016/j.tibs.2006.10.003	PAP activity has a central role in the synthesis of phospholipids and triacylglycerol through its product diacylglycerol, and it also generates and/or degrades lipid-signalling molecules that are related to phosphatidate.	1061	5	3.75818	18.9072	6.56746
Aeromonas caviae	HAMBI_1972	evolved	ancestral	H1972_00673	rpoS	rpoS	K	Central metabolism		RNA polymerase sigma. Reduced RpoS affinitiy to the RNA polymerase, beneficial under constant conditions. Decreases competition between sigma70 and rpoS	814	6	5.87827	25.0924	6.56746
Aeromonas caviae	HAMBI_1972	evolved	ancestral	H1972_00678	rpoD	rpoD	K	Central metabolism		Sigma 70 is the primary sigma factor during exponential growth, targeting RNA polymerase sigma 70 to a wide range of promoters that are essential for normal growth.	1575	4	2.02536	12.9248	6.56746
Aeromonas caviae	HAMBI_1972	evolved	ancestral	H1972_00816	ispB	ispB	H	Central metabolism	DOI: 10.1006/bbrc.1994.1933	Belongs to the FPP GGPP synthase family	804	3	2.97569	11.0998	6.56746
Aeromonas caviae	HAMBI_1972	evolved	ancestral	H1972_01805	ltaA	ltaA	E	Central metabolism	DOI: 10.1111/j.1574-6968.1997.tb12577.x	Beta-eliminating lyase	817	3	2.92835	11.0522	6.56746
Aeromonas caviae	HAMBI_1972	evolved	ancestral	H1972_02107	acpP	acpP	Q	Central metabolism	DOI: 10.1016/S0021-9258(18)42616-6	Carrier of the growing fatty acid chain in fatty acid biosynthesis	207	3	11.5578	15.1451	6.56746
Aeromonas caviae	HAMBI_1972	evolved	ancestral	H1972_02461	cdd	cdd	F	Central metabolism	DOI: 10.1007/BF00330992	This enzyme scavenges exogenous and endogenous cytidine and 2'-deoxycytidine for UMP synthesis	716	4	4.45523	16.0394	6.56746
Aeromonas caviae	HAMBI_1972	evolved	ancestral	H1972_00362	lptB_1	lptB_1	S	Outer membrane	DOI: 10.1128/JB.01126-06	LptB is a cytoplasmic ATPase that energises the transport and assembly of lipopolysaccharide (LPS) by the Lpt system.	610	3	3.92206	11.92	6.56746
Aeromonas caviae	HAMBI_1972	evolved	ancestral	H1972_00671	yqaA		S	Outer membrane	DOI: 10.1099/mic.0.056325-0	dedA associated Golgi protein	476	3	5.02617	12.6584	6.56746
Aeromonas caviae	HAMBI_1972	evolved	ancestral	H1972_00159	spuD_1	spuD_1	P	Transporter		Required for the activity of the bacterial periplasmic transport system of putrescine	919	3	2.60333	10.7036	6.56746
Aeromonas caviae	HAMBI_1972	evolved	ancestral	H1972_02826	ynjC		P	Transporter	DOI: 10.1038/s41467-022-30889-1	Colistin resistance. transport system permease component	1263	3	1.89427	9.76422	6.56746
Aeromonas caviae	HAMBI_1972	evolved	ancestral	H1972_03098	metN3	metN_2	P	Transporter		Part of the ABC transporter complex MetNIQ involved in methionine import. Responsible for energy coupling to the transport system	635	3	3.76765	11.8005	6.56746
Aeromonas caviae	HAMBI_1972	evolved	ancestral	H1972_03115	corC	corC	P	Transporter		Magnesium and cobalt efflux protein CorC	754	5	5.28837	20.6006	6.56746
Aeromonas caviae	HAMBI_1972	evolved	ancestral	H1972_01539	phoE_1	phoE_1	M	Transporter/Outer membrane	DOI: 10.1128/jb.149.2.668-672.1982	Belongs to the Gram-negative porin family	875	3	2.73424	10.8489	6.56746
Aeromonas caviae	HAMBI_1972	evolved	ancestral	H1972_01043	mexB	mexB	V			Efflux pump membrane transporter	2469	3	0.968999	7.8041	6.56746
Aeromonas caviae	HAMBI_1972	evolved	ancestral	H1972_01157	smc	smc	D			Required for chromosome condensation and partitioning	2754	3	0.868721	7.48836	6.56746
Aeromonas caviae	HAMBI_1972	evolved	ancestral	H1972_02204	minD	minD	D		DOI: 10.1016/s0168-1656(01)00293-0	Belongs to the ParA family	667	3	3.58689	11.6544	6.56746
Aeromonas caviae	HAMBI_1972	evolved	ancestral	H1972_02205	minE	minE	D		DOI: 10.1111/j.1365-2958.1995.mmi_18020321.x	Prevents the cell division inhibition by proteins MinC and MinD at internal division sites while permitting inhibition at polar sites. This ensures cell division at the proper site by restricting the formation of a division septum at the midpoint of the long axis of the cell	236	9	30.4126	36.7368	6.56746
Aeromonas caviae	HAMBI_1972	evolved	evolved	H1972_00673	rpoS	rpoS	K	Central metabolism		RNA polymerase sigma. Reduced RpoS affinitiy to the RNA polymerase, beneficial under constant conditions. Decreases competition between sigma70 and rpoS	814	3	2.93914	14.8712	6.61608
Aeromonas caviae	HAMBI_1972	evolved	evolved	H1972_00678	rpoD	rpoD	K	Central metabolism		Sigma 70 is the primary sigma factor during exponential growth, targeting RNA polymerase sigma 70 to a wide range of promoters that are essential for normal growth.	1575	3	1.51902	12.9001	6.61608
Aeromonas caviae	HAMBI_1972	evolved	evolved	H1972_00421	hyp		S	Outer membrane		Located in flagellar operon. Protein of unknown function DUF115	819	6	5.84239	32.6764	6.61608
Aeromonas caviae	HAMBI_1972	evolved	evolved	H1972_01454	wecA	wecA	M	Outer membrane	DOI: 10.1128/JB.01905-06	Lipopolysaccharide biosynthesis. Catalyzes the transfer of the GlcNAc-1-phosphate moiety from UDP-GlcNAc onto the carrier lipid undecaprenyl phosphate (C55-P), yielding GlcNAc-pyrophosphoryl-undecaprenyl (GlcNAc-PP-C55).	1056	2	1.51039	8.8969	6.61608
Aeromonas caviae	HAMBI_1972	evolved	evolved	H1972_02723	yifE		S	Transcription	https://www.uniprot.org/uniprotkb/P0ADN2/entry	Protein of unknown function, DUF	337	3	7.09928	17.5112	6.61608
Aeromonas caviae	HAMBI_1972	evolved	evolved	H1972_00159	spuD_1	spuD_1	P	Transporter		Required for the activity of the bacterial periplasmic transport system of putrescine	919	3	2.60333	14.5085	6.61608
Aeromonas caviae	HAMBI_1972	evolved	evolved	H1972_03098	metN3	metN_2	P	Transporter		Part of the ABC transporter complex MetNIQ involved in methionine import. Responsible for energy coupling to the transport system	635	3	3.76765	15.6141	6.61608
Aeromonas caviae	HAMBI_1972	evolved	evolved	H1972_01106	lamB_2	lamB_2	M	Transporter/Outer membrane	https://www.uniprot.org/uniprotkb/P02943/entry	Involved in the transport of maltose and maltodextrins. Indispensable for translocation of maltodextrins (alpha 1-4 linked polyglucosyls) containing more than three glucosyl moieties.	1107	3	2.16121	13.9523	6.61608
Aeromonas caviae	HAMBI_1972	evolved	evolved	H1972_01539	phoE_1	phoE_1	M	Transporter/Outer membrane	DOI: 10.1128/jb.149.2.668-672.1982	Belongs to the Gram-negative porin family	875	3	2.73424	14.6552	6.61608
Aeromonas caviae	HAMBI_1972	evolved	evolved	H1972_01157	smc	smc	D			Required for chromosome condensation and partitioning	2754	3	0.868721	11.2376	6.61608
Aeromonas caviae	HAMBI_1972	evolved	evolved	H1972_02204	minD	minD	D		DOI: 10.1016/s0168-1656(01)00293-0	Belongs to the ParA family	667	3	3.58689	15.467	6.61608
Citrobacter koseri	HAMBI_1287	evolved	ancestral	H1287_00057	dgaF_1	dgaF_1	S	Central metabolism	DOI: 10.1128/JB.00290-13	The dgaF gene of Salmonella enterica enterica serovar Typhimurium str. 14028S is located in a D-glucosaminate degradation operon. A dgaF deletion mutant can grow on 2-amino-2-deoxy-D-gluconate minimal medium, but the growth rate is significantly slower that that of the wild type. Sequence analysis suggested that dgaF encodes a 2-dehydro-3-deoxy-phosphogluconate aldolase (KDGP aldolase)	605	3	3.95244	14.6171	8.10322
Citrobacter koseri	HAMBI_1287	evolved	ancestral	H1287_00563	agaS	agaS	G	Central metabolism	DOI: 10.1046/j.1365-2958.2000.01969.x	AgaS has been predicted to be an isomerase involved in N-acetylgalactosamine (GalNAc) utilization in some strains of E. coli	937	2	1.70134	8.37589	8.10322
Citrobacter koseri	HAMBI_1287	evolved	ancestral	H1287_03912	fdhF_2	fdhF_2	C	Central metabolism	DOI: 10.1007/BF00329847	Decomposes formic acid to hydrogen and carbon dioxide under anaerobic conditions in the absence of exogenous electron acceptors.	346	2	4.60737	10.3593	8.10322
Citrobacter koseri	HAMBI_1287	evolved	ancestral	H1287_02160	srfB		S	Outer membrane	DOI: 10.1111/ppa.13034	Virulence factor SrfB	2459	3	0.972439	10.4423	8.10322
Citrobacter koseri	HAMBI_1287	evolved	ancestral	H1287_02172	yddV_2		T	Outer membrane	DOI: 10.1099/mic.0.041350-0	Exopolysaccharide biosynthesis. diguanylate cyclase	923	17	14.6807	39.2243	8.10322
Citrobacter koseri	HAMBI_1287	evolved	ancestral	H1287_02829	ybhG		M	Outer membrane		Biotin-lipoyl like	810	3	2.95213	13.7452	8.10322
Citrobacter koseri	HAMBI_1287	evolved	ancestral	H1287_00623	dhaR	dhaR	Q	Transcription	DOI: 10.1038/sj.emboj.7600517	Bacterial regulatory protein, Fis family	1612	3	1.48339	11.6945	8.10322
Citrobacter koseri	HAMBI_1287	evolved	ancestral	H1287_00316	ompR	ompR_1	K	Transcription/Transporter/Outer membrane	DOI: 10.1038/s41598-017-02110-7	Member of the two-component regulatory system EnvZ/OmpR involved in osmoregulation (particularly of genes ompF and ompC) as well as other genes	726	7	7.6853	39.2243	8.10322
Citrobacter koseri	HAMBI_1287	evolved	ancestral	H1287_01647	cbiM	cbiM	P	Transporter		Part of the energy-coupling factor (ECF) transporter complex CbiMNOQ involved in cobalt import	594	3	4.02564	14.672	8.10322
Citrobacter koseri	HAMBI_1287	evolved	ancestral	H1287_02337	artM5	yhdY_2	P	Transporter	DOI: 10.1128/AEM.01573-07	Binding-protein-dependent transport system inner membrane component	540	2	2.95213	9.47202	8.10322
Citrobacter koseri	HAMBI_1287	evolved	ancestral	H1287_03251	afuB		P	Transporter		Binding-protein-dependent transport system inner membrane component	1685	4	1.89217	16.1985	8.10322
Citrobacter koseri	HAMBI_1287	evolved	evolved	H1287_02160	srfB		S	Outer membrane	DOI: 10.1111/ppa.13034	Virulence factor SrfB	2459	3	0.972439	12.3552	8.57812
Citrobacter koseri	HAMBI_1287	evolved	evolved	H1287_02172	yddV_2		T	Outer membrane	DOI: 10.1099/mic.0.041350-0	Exopolysaccharide biosynthesis. diguanylate cyclase	923	13	11.2264	36.7368	8.57812
Citrobacter koseri	HAMBI_1287	evolved	evolved	H1287_02829	ybhG		M	Outer membrane		Biotin-lipoyl like	810	3	2.95213	15.6716	8.57812
Citrobacter koseri	HAMBI_1287	evolved	evolved	H1287_00316	ompR	ompR_1	K	Transcription/Transporter/Outer membrane	DOI: 10.1038/s41598-017-02110-7	Member of the two-component regulatory system EnvZ/OmpR involved in osmoregulation (particularly of genes ompF and ompC) as well as other genes	726	7	7.6853	59.7627	8.57812
Pseudomonas chlororaphis	HAMBI_1977	evolved	ancestral	H1977_05366	pdxA	pdxA	H	Central metabolism	DOI: 10.1128/jb.184.5.1359-1369.2002	4-Hydroxythreonine-4-phosphate dehydrogenase (PdxA) catalyzes the fourth step in the pyridoxal 5'-phosphate biosynthesis I pathway.	795	3	3.05826	12.1265	6.83738
Pseudomonas chlororaphis	HAMBI_1977	evolved	ancestral	H1977_05641	argE_3	argE_3	E	Central metabolism		Catalyzes the hydrolysis of the amide bond of N2-acetylated L-amino acids. Cleaves the acetyl group from N-acetyl-L-ornithine to form L-ornithine, an intermediate in L-arginine biosynthesis pathway, and a branchpoint in the synthesis of polyamines	965	4	3.35934	16.1816	6.83738
Pseudomonas chlororaphis	HAMBI_1977	evolved	ancestral	H1977_05849	yciA		I	Central metabolism	DOI: 10.1099/mic.0.078329-0	YciA is an acyl-CoA thioesterase with broad substrate specificity. Related to fermentative production of short-chain fatty acids	327	2	4.95682	9.35248	6.83738
Pseudomonas chlororaphis	HAMBI_1977	evolved	ancestral	H1977_00727	yfiB	pal_1	M	Outer membrane	DOI: 10.3390/microorganisms10030653	Activates the diguanylate cyclase TpbB/YfiN by sequestering YfiR at the outer membrane, which counteracts the YfiR-mediated repression of TpbB/YfiN at the inner membrane and leads to increased c-di-GMP production	407	7	13.9388	42.1117	6.83738
Pseudomonas chlororaphis	HAMBI_1977	evolved	ancestral	H1977_04823	lpxC	lpxC	M	Outer membrane	DOI: 10.2174/138920108783497668	Catalyzes the hydrolysis of UDP-3-O-myristoyl-N- acetylglucosamine to form UDP-3-O-myristoylglucosamine and acetate, the committed step in lipid A biosynthesis	755	20	21.4686	42.1117	6.83738
Pseudomonas chlororaphis	HAMBI_1977	evolved	ancestral	H1977_02929	nfxB		K	Transcription	DOI: 10.1371/journal.pone.0066236	Transcriptional regulator	465	4	6.97152	19.0858	6.83738
Pseudomonas chlororaphis	HAMBI_1977	evolved	ancestral	H1977_02612	dppA/oppA		E	Transporter		ABC-type oligopeptide transport system, periplasmic component	1513	3	1.60695	10.2177	6.83738
Pseudomonas chlororaphis	HAMBI_1977	evolved	ancestral	H1977_05845	pstA		P	Transporter		phosphate transport system permease	1350	3	1.80098	10.5547	6.83738
Pseudomonas chlororaphis	HAMBI_1977	evolved	evolved	H1977_05026	cbrA	sasA_19	T	Central metabolism	DOI: 10.1046/j.1365-2958.2001.02435.x	Two component regulatory system	2399	3	1.01347	14.3848	10.5271
Pseudomonas chlororaphis	HAMBI_1977	evolved	evolved	H1977_04823	lpxC	lpxC	M	Outer membrane	DOI: 10.2174/138920108783497668	Catalyzes the hydrolysis of UDP-3-O-myristoyl-N- acetylglucosamine to form UDP-3-O-myristoylglucosamine and acetate, the committed step in lipid A biosynthesis	755	10	10.7343	39.1305	10.5271
Pseudomonas chlororaphis	HAMBI_1977	evolved	evolved	H1977_05845	pstA		P	Transporter		phosphate transport system permease	1350	3	1.80098	16.1047	10.5271
Stenotrophomonas maltophilia	HAMBI_2659	evolved	ancestral	H2659_00656	smf-1	smf-1	U	Outer membrane	DOI: 10.1046/j.1462-5822.2003.00306.x	Fimbrial protein	430	7	12.681	41.734	6.46546
Stenotrophomonas maltophilia	HAMBI_2659	evolved	ancestral	H2659_03908	rcsC_14	rcsC_14	T	Outer membrane/Transcription	DOI: 10.1128/jb.184.4.1204-1208.2002	Rcs two-component pathway is involved in the regulation of capsule production in Escherichia coli.	2107	2	0.739416	6.526	6.46546
Stenotrophomonas maltophilia	HAMBI_2659	evolved	ancestral	H2659_03614	btuB_26	btuB_26	P	Transporter/Outer membrane	DOI: 10.1128/jb.177.23.6810-6819.1995	Outer membrane protein that mediates binding and TonB-dependent active transport of substrates across the outer membrane	2386	5	1.63239	18.7082	6.46546
Stenotrophomonas maltophilia	HAMBI_2659	evolved	ancestral	H2659_03917	btuB_32	btuB_32	P	Transporter/Outer membrane	DOI: 10.1128/jb.177.23.6810-6819.1995	Outer membrane protein that mediates binding and TonB-dependent active transport of substrates across the outer membrane	1877	2	0.830021	6.75319	6.46546
Stenotrophomonas maltophilia	HAMBI_2659	evolved	evolved	H2659_00656	smf-1	smf-1	U	Outer membrane	DOI: 10.1046/j.1462-5822.2003.00306.x	Fimbrial protein	430	12	21.7388	56.8723	8.19257
Stenotrophomonas maltophilia	HAMBI_2659	evolved	evolved	H2659_01014	yapH		U	Outer membrane	DOI: 10.1080/09687860600927626	Autotransporter beta-domain	8316	3	0.281016	8.96848	8.19257
Stenotrophomonas maltophilia	HAMBI_2659	evolved	evolved	H2659_03614	btuB_26	btuB_26	P	Transporter/Outer membrane	DOI: 10.1128/jb.177.23.6810-6819.1995	Outer membrane protein that mediates binding and TonB-dependent active transport of substrates across the outer membrane	2386	7	2.28534	33.8464	8.19257
Stenotrophomonas maltophilia	HAMBI_2659	evolved	evolved	H2659_03917	btuB_32	btuB_32	P	Transporter/Outer membrane	DOI: 10.1128/jb.177.23.6810-6819.1995	Outer membrane protein that mediates binding and TonB-dependent active transport of substrates across the outer membrane	1877	2	0.830021	8.42203	8.19257
Stenotrophomonas maltophilia	HAMBI_2659	evolved	evolved	H2659_01789	hyp		S				196	3	11.9231	20.1436	8.19257

## Sheet: Sheet2
Species	strainID	Prey history	locus tag	gene	prokka_gene	COG category	Function custom grouping	Reference	Function description	Number of nonsynonymous sites	Observed nonsyn mutations	Multiplicitiy	-log10(P)	P*
Acinetobacter johnsonii	HAMBI_0097	coevolved inoculum	H0097_02729			S			Peptidase C13 family	1176	3	1.90142	15.3275	15.3275
Aeromonas caviae	HAMBI_1972	coevolved inoculum	H1972_02204	minD	minD	D		DOI: 10.1016/s0168-1656(01)00293-0	Belongs to the ParA family	667	2	2.39126	9.93256	9.93256
Aeromonas caviae	HAMBI_1972	coevolved inoculum	H1972_02205	minE	minE	D		DOI: 10.1111/j.1365-2958.1995.mmi_18020321.x	Prevents the cell division inhibition by proteins MinC and MinD at internal division sites while permitting inhibition at polar sites. This ensures cell division at the proper site by restricting the formation of a division septum at the midpoint of the long axis of the cell	236	2	6.75836	12.0062	9.93256
Aeromonas caviae	HAMBI_1972	coevolved inoculum	H1972_02723	yifE		S	Transcription	https://www.uniprot.org/uniprotkb/P0ADN2/entry	Protein of unknown function, DUF	337	2	4.73285	11.2947	9.93256
Brevundimonas bullata	HAMBI_0262	coevolved inoculum	H0262_00089	phnD2	phnD2	P			ABC transporter, phosphonate, periplasmic substrate-binding protein	810	2	1.84532	10.3117	7.47526
Brevundimonas bullata	HAMBI_0262	coevolved inoculum	H0262_00732	sasA_7	sasA_7	T			MASE1	1306	2	1.14449	9.35963	7.47526
Brevundimonas bullata	HAMBI_0262	coevolved inoculum	H0262_00934	rpoB	rpoB	K			DNA-dependent RNA polymerase catalyzes the transcription of DNA into RNA using the four ribonucleoside triphosphates as substrates	3374	2	0.443008	7.47526	7.47526
Citrobacter koseri	HAMBI_1287	coevolved inoculum	H1287_00316	ompR	ompR_1	K	Transcription/Transporter/Outer membrane	DOI: 10.1038/s41598-017-02110-7	Member of the two-component regulatory system EnvZ/OmpR involved in osmoregulation (particularly of genes ompF and ompC) as well as other genes	726	2	2.1958	10.0736	9.34973
Citrobacter koseri	HAMBI_1287	coevolved inoculum	H1287_02172	yddV_2		T	Outer membrane	DOI: 10.1099/mic.0.041350-0	Exopolysaccharide biosynthesis. diguanylate cyclase	923	4	3.45428	20.9757	9.34973
Comamonas testosteroni	HAMBI_0403	coevolved inoculum	H0403_00124	sasA_2	sasA_2	T			histidine kinase HAMP region domain protein	943	3	2.50291	15.4636	10.9031
Comamonas testosteroni	HAMBI_0403	coevolved inoculum	H0403_04847	glpK	glpK	F			Key enzyme in the regulation of glycerol uptake and metabolism. Catalyzes the phosphorylation of glycerol to yield sn- glycerol 3-phosphate. Increases enzymatic activity through loss of alosteric inhibition.	1203	4	2.61596	20.4334	10.9031
Cupriavidus oxalaticus	HAMBI_2164	coevolved inoculum	H2164_00335			Q			AMP-binding enzyme C-terminal domain	1243	3	1.90909	9.7624	8.70989
Cupriavidus oxalaticus	HAMBI_2164	coevolved inoculum	H2164_03223	ybgI	ybgI	S			NIF3 (NGG1p interacting factor 3)	606	3	3.91583	11.8902	8.70989
Hafnia alvei	HAMBI_1279	coevolved inoculum	H1279_00765	rpoS	rpoS_1	K			RNA polymerase sigma	204	3	11.6119	19.9043	19.9043
Hafnia alvei	HAMBI_1279	coevolved inoculum	H1279_02096	btuC	btuC	H			Part of the ABC transporter complex BtuCDF involved in vitamin B12 import.	704	8	8.97284	42.9301	19.9043
Microvirga lotononidis	HAMBI_3237	coevolved inoculum	H3237_00478	glpS	msmX_2	P			TOBE domain	853	4	3.26011	11.2733	8.8972
Microvirga lotononidis	HAMBI_3237	coevolved inoculum	H3237_02296	livF_6	livF_6	E			ATPases associated with a variety of cellular activities	563	5	6.17423	16.9231	8.8972
Microvirga lotononidis	HAMBI_3237	coevolved inoculum	H3237_03349			S				178	4	15.6229	17.4555	8.8972
Microvirga lotononidis	HAMBI_3237	coevolved inoculum	H3237_03943			S			Ankyrin repeat	426	3	4.89591	9.91566	8.8972
Microvirga lotononidis	HAMBI_3237	coevolved inoculum	H3237_04517			S			Oxygen tolerance	974	4	2.85511	10.758	8.8972
Paraburkholderia kururiensis	HAMBI_2494	coevolved inoculum	H2494_00163	acxR	acoR_1	Q			GAF domain	1629	3	1.46232	13.5098	7.02047
Paraburkholderia kururiensis	HAMBI_2494	coevolved inoculum	H2494_00166	acxA	acxA_1	E			5-oxoprolinase	1741	2	0.912164	8.37648	7.02047
Paraburkholderia kururiensis	HAMBI_2494	coevolved inoculum	H2494_00327	fdoH	fdnH	C			Formate dehydrogenase beta subunit	778	2	2.04123	9.97949	7.02047
Paraburkholderia kururiensis	HAMBI_2494	coevolved inoculum	H2494_01194	yhaJ_1	yhaJ_1	K			Transcriptional regulator	720	2	2.20566	10.134	7.02047
Paraburkholderia kururiensis	HAMBI_2494	coevolved inoculum	H2494_01989	gltR_2	gltR	K			transcriptional Regulator, LysR family	708	2	2.24305	10.1675	7.02047
Paraburkholderia kururiensis	HAMBI_2494	coevolved inoculum	H2494_02668	tgnB_2	tgnB_2	C			Luciferase-like monooxygenase	882	2	1.80054	9.72942	7.02047
Paraburkholderia kururiensis	HAMBI_2494	coevolved inoculum	H2494_03421	pepQ		E			peptidase M24	1462	3	1.62936	13.8327	7.02047
Paraburkholderia kururiensis	HAMBI_2494	coevolved inoculum	H2494_03519	hemB	hemB	H			Belongs to the ALAD family	816	2	1.94617	9.88443	7.02047
Paraburkholderia kururiensis	HAMBI_2494	coevolved inoculum	H2494_03556	rpoC	rpoC	K			DNA-dependent RNA polymerase catalyzes the transcription of DNA into RNA using the four ribonucleoside triphosphates as substrates	3454	2	0.459779	7.02047	7.02047
Paraburkholderia kururiensis	HAMBI_2494	coevolved inoculum	H2494_04167	ispE	ispE	F			Catalyzes the phosphorylation of the position 2 hydroxy group of 4-diphosphocytidyl-2C-methyl-D-erythritol	704	2	2.25579	10.1788	7.02047
Paraburkholderia kururiensis	HAMBI_2494	coevolved inoculum	H2494_04708	nlaXM	dcm	L			PFAM C-5 cytosine-specific DNA methylase	1026	5	3.86959	26.6144	7.02047
Paraburkholderia kururiensis	HAMBI_2494	coevolved inoculum	H2494_04782	purD	purD	F			Belongs to the GARS family	1031	2	1.54033	9.41847	7.02047
Paraburkholderia kururiensis	HAMBI_2494	coevolved inoculum	H2494_04848			I			PFAM MaoC domain protein dehydratase	381	2	4.16818	11.4041	7.02047
Paracoccus denitrificans	HAMBI_2443	coevolved inoculum	H2443_02447	ctpA		M			Belongs to the peptidase S41A family	1161	2	1.27499	9.45188	9.45188
Paracoccus denitrificans	HAMBI_2443	coevolved inoculum	H2443_02537			S				849	6	5.23061	34.6574	9.45188
Paracoccus denitrificans	HAMBI_2443	coevolved inoculum	H2443_02540			S				4888	6	0.908509	24.2507	9.45188
Paracoccus denitrificans	HAMBI_2443	coevolved inoculum	H2443_03044	pseI	pseI	M			acid synthase	870	2	1.70145	10.0269	9.45188
Pseudomonas chlororaphis	HAMBI_1977	coevolved inoculum	H1977_00727	yfiB	pal_1	M	Outer membrane	DOI: 10.3390/microorganisms10030653	Activates the diguanylate cyclase TpbB/YfiN by sequestering YfiR at the outer membrane, which counteracts the YfiR-mediated repression of TpbB/YfiN at the inner membrane and leads to increased c-di-GMP production	407	3	5.97376	19.4116	9.27434
Pseudomonas chlororaphis	HAMBI_1977	coevolved inoculum	H1977_04823	lpxC	lpxC	M	Outer membrane	DOI: 10.2174/138920108783497668	Catalyzes the hydrolysis of UDP-3-O-myristoyl-N- acetylglucosamine to form UDP-3-O-myristoylglucosamine and acetate, the committed step in lipid A biosynthesis	755	5	5.36715	31.0635	9.27434
Pseudomonas putida	HAMBI_0006	coevolved inoculum	H0006_02025			S				1015	12	9.38526	45.295	9.59829
Pseudomonas putida	HAMBI_0006	coevolved inoculum	H0006_03238	csiR	glaR_2	K			Transcriptional	575	3	4.14175	9.59829	9.59829
Sphingobium yanoikuyae	HAMBI_1842	coevolved inoculum	H1842_00504			S	Outer membrane	DOI: 10.1073/pnas.0801196105	YjgP YjgQ family	966	3	2.42957	16.2706	9.75653
Sphingobium yanoikuyae	HAMBI_1842	coevolved inoculum	H1842_00573	ppk	ppk	P			Catalyzes the reversible transfer of the terminal phosphate of ATP to form a long-chain polyphosphate (polyP)	1757	3	1.33578	14.481	9.75653
Stenotrophomonas maltophilia	HAMBI_2659	coevolved inoculum	H2659_03614	btuB_26	btuB_26	P	Transporter/Outer membrane	DOI: 10.1128/jb.177.23.6810-6819.1995	Outer membrane protein that mediates binding and TonB-dependent active transport of substrates across the outer membrane	2386	2	0.652955	7.80265	7.80265
Stenotrophomonas maltophilia	HAMBI_2659	coevolved inoculum	H2659_03908	rcsC_14	rcsC_14	T	Outer membrane/Transcription	DOI: 10.1128/jb.184.4.1204-1208.2002	Rcs two-component pathway is involved in the regulation of capsule production in Escherichia coli.	2107	2	0.739416	8.04911	7.80265
Stenotrophomonas maltophilia	HAMBI_2659	coevolved inoculum	H2659_03917	btuB_32	btuB_32	P	Transporter/Outer membrane	DOI: 10.1128/jb.177.23.6810-6819.1995	Outer membrane protein that mediates binding and TonB-dependent active transport of substrates across the outer membrane	1877	3	1.24503	13.164	7.80265
Trinickia caryophylli	HAMBI_2159	coevolved inoculum	H2159_00234	adhA		C			alcohol dehydrogenase	823	24	23.4959	59.7627	7.30704
Trinickia caryophylli	HAMBI_2159	coevolved inoculum	H2159_00323			O			Phospholipid methyltransferase	376	18	38.5714	59.7627	7.30704
Trinickia caryophylli	HAMBI_2159	coevolved inoculum	H2159_00325	trxB_1	trxB_1	O			Thioredoxin reductase	723	26	28.9745	59.7627	7.30704
Trinickia caryophylli	HAMBI_2159	coevolved inoculum	H2159_00326			K			AefR-like transcriptional repressor, C-terminal region	536	4	6.01279	12.685	7.30704
Trinickia caryophylli	HAMBI_2159	coevolved inoculum	H2159_00397	frc2	frc_1	C			Involved in the catabolism of oxalate and in the adapatation to low pH via the induction of the oxalate-dependent acid tolerance response (ATR). Catalyzes the transfer of the CoA moiety from formyl-CoA to oxalate	1103	4	2.9219	9.87806	7.30704
Trinickia caryophylli	HAMBI_2159	coevolved inoculum	H2159_01425			S			Peptidase M61	1453	17	9.4268	59.7627	7.30704
Trinickia caryophylli	HAMBI_2159	coevolved inoculum	H2159_01932	hisC_3	hisC_3	K			Transcriptional regulator	1032	4	3.12292	10.1342	7.30704
Trinickia caryophylli	HAMBI_2159	coevolved inoculum	H2159_01966			S				346	4	9.31461	14.409	7.30704
Trinickia caryophylli	HAMBI_2159	coevolved inoculum	H2159_01969	gcvA_3	gcvA_3	K			Bacterial regulatory helix-turn-helix protein, lysR family	714	4	4.5138	11.563	7.30704
Trinickia caryophylli	HAMBI_2159	coevolved inoculum	H2159_01982	putA	putA	C			Oxidizes proline to glutamate for use as a carbon and nitrogen source	3125	10	2.57829	21.5527	7.30704
Trinickia caryophylli	HAMBI_2159	coevolved inoculum	H2159_02042	oprM_4	oprM_4	M			RND efflux system, outer membrane lipoprotein, NodT family	1156	4	2.78794	9.69777	7.30704
Trinickia caryophylli	HAMBI_2159	coevolved inoculum	H2159_02256	fldA	galD	S			PrpF protein	939	3	2.57417	7.30704	7.30704
Trinickia caryophylli	HAMBI_2159	coevolved inoculum	H2159_02466	copA_2	ftsP_1	Q			multicopper oxidase type 3	1058	12	9.13853	36.7368	7.30704
Trinickia caryophylli	HAMBI_2159	coevolved inoculum	H2159_02708	adhC	flhA_2	C			Belongs to the zinc-containing alcohol dehydrogenase family. Class-III subfamily	908	6	5.3241	17.7008	7.30704
Trinickia caryophylli	HAMBI_2159	coevolved inoculum	H2159_03087	ilvC	ilvC	H			Involved in the biosynthesis of branched-chain amino acids (BCAA). Catalyzes an alkyl-migration followed by a ketol- acid reduction of (S)-2-acetolactate (S2AL) to yield (R)-2,3- dihydroxy-isovalerate. In the isomerase reaction, S2AL is rearranged via a Mg-dependent methyl migration to produce 3- hydroxy-3-methyl-2-ketobutyrate (HMKB). In the reductase reaction, this 2-ketoacid undergoes a metal-…	839	4	3.84131	10.9353	7.30704
Trinickia caryophylli	HAMBI_2159	coevolved inoculum	H2159_03364	thiC	thiC	H			Catalyzes the synthesis of the hydroxymethylpyrimidine phosphate (HMP-P) moiety of thiamine from aminoimidazole ribotide (AIR) in a radical S-adenosyl-L-methionine (SAM)-dependent reaction	1605	8	4.01602	20.9448	7.30704
